# Supplementary material for: Clinician Factors Related to Outcome Differences Between Black and White Patients at CMHCs
Source: Atypon-hosted journal article supplement (doi:10.1176/ps.62.5.pss6205_0525), 2011-05-01
Supplement: Larrison_DS.pdf [file Larrison_DS.pdf]

## LARRISON ET AL., ONLINE SUPPLEMENT

**Table 6: Unconditional Model: Fixed Effects**

| Fixed Effects                                        | Coefficient | SE   | <i>df</i> | <i>t</i> -ratio |
|------------------------------------------------------|-------------|------|-----------|-----------------|
| Patient-Level Intercept                              |             |      |           |                 |
| Average initial BASIS-24 score, $b_{00}$             | 1.494       | .045 | 61        | 33.463***       |
| Patient-Level Slope                                  |             |      |           |                 |
| Average treatment outcome - BASIS-24 score, $b_{10}$ | -.182       | .059 | 61        | -3.107**        |

NOTE: \*  $p < .05$  (two-tailed), \*\*  $p < .01$  (two-tailed), \*\*\*  $p < .001$  (two-tailed)

**Table 7: Unconditional Model: Random Effects**

| Random Effects                                                           | Variance | <i>df</i> | Chi-Square <sup>1</sup> | Reliability |
|--------------------------------------------------------------------------|----------|-----------|-------------------------|-------------|
| Level 1: Within patients                                                 |          |           |                         |             |
| Residual error, $e$                                                      | .118     |           |                         |             |
| Level 2: Patients within clinicians, $N=551$                             |          |           |                         |             |
| Variability in initial BASIS-24 score, $r_0$                             | .352     | 366       | 1619.4***               | .763.       |
| Variability in treatment outcomes, $r_1$                                 | .413     | 366       | 520.4***                | .259.       |
| Level 3: Between clinicians, $N=62$                                      |          |           |                         |             |
| Variability in mean clinician initial BASIS-24 score $u_{00}$            | .063     | 59        | 132.3***                | .512        |
| Variability in mean clinician treatment outcomes <sup>2</sup> , $u_{10}$ | .001     | 59        | 77.3                    | .003        |

NOTE: \*  $p < .05$  (two-tailed), \*\*  $p < .01$  (two-tailed), \*\*\*  $p < .001$  (two-tailed)

<sup>1</sup> The estimated variance components are based on all the data, but the associated chi-square statistics are based only on those clinicians ( $N=60$ ) and patients ( $N=426$ ) with sufficient data for computation.

<sup>2</sup> This parameter was constrained to be fixed in subsequent models due to its low reliability.

**Table 8: Patient-Level Predictors Model: Fixed Effects**

| Fixed Effects                                         | Coefficient | SE   | df  | t-ratio  |
|-------------------------------------------------------|-------------|------|-----|----------|
| Patient-Level Intercept                               |             |      |     |          |
| Average initial BASIS-24 score, $b_{00}$              | 1.492       | .044 | 61  | 33.89*** |
| Patient-Level Slope                                   |             |      |     |          |
| Average treatment outcomes - BASIS-24 score, $b_{10}$ | -.002       | .127 | 542 | -.012    |
| Patient Age, $b_{11}$                                 | .012        | .005 | 542 | 2.241*   |
| Psychotropic Medication, $b_{12}$                     | .091        | .125 | 542 | .734     |
| Male, $b_{13}$                                        | -.030       | .119 | 542 | -.252    |
| Work (paid or volunteer), $b_{14}$                    | -.192       | .139 | 542 | -1.381   |
| Schizophrenia, $b_{15}$                               | .083        | .160 | 542 | .519     |
| Medicaid/Medicare, $b_{16}$                           | -.260       | .139 | 542 | -1.875   |
| Black, $b_{17}$                                       | -.080       | .155 | 61  | -.515    |
| Root-hours of service, $b_{18}$                       | .028        | .010 | 542 | 2.720**  |

NOTE: \*  $p < .05$  (two-tailed), \*\*  $p < .01$  (two-tailed), \*\*\*  $p < .001$  (two-tailed)

**Table 9: Patient-Level Predictors Model: Random Effects**

| Random Effects                                                           | Variance | df  | Chi-Square <sup>1</sup> | Reliability |
|--------------------------------------------------------------------------|----------|-----|-------------------------|-------------|
| Level 1: Within patients                                                 |          |     |                         |             |
| Residual error, $e$                                                      | .119     |     |                         |             |
| Level 2: Patients within clinicians, $N=551$                             |          |     |                         |             |
| Variability in initial BASIS-24 score, $r_0$                             | .352     | 315 | 1358.8***               | .761        |
| Variability treatment outcomes, $r_1$                                    | .303     | 307 | 424.8***                | .203        |
| Level 3: Between clinicians, $N=51$                                      |          |     |                         |             |
| Variability in mean clinician initial BASIS-24 score $u_{00}$            | .059     | 50  | 120.2***                | .515        |
| Variability in mean clinician treatment outcomes <sup>2</sup> , $u_{10}$ | —        | —   | —                       | —           |
| Variability in racial differences effect, $u_{17}$                       | .164     | 50  | 74.4*                   | .184        |

NOTE: \*  $p < .05$  (two-tailed), \*\*  $p < .01$  (two-tailed), \*\*\*  $p < .001$  (two-tailed)

<sup>1</sup> The estimated variance components are based on all the data, but the associated chi-square statistics are based only on those clinicians ( $N=51$ ) and patients ( $N=366$ ) with sufficient data for computation.

<sup>2</sup> This parameter was not included in the model due to insufficient reliability.
